# Supplementary material for: Photo-thermal staged-responsive shape memory polymers prepared by fused granular fabrication 4D printing
Source: Royal Society of Chemistry journal article supplement (doi:10.1039/d4ta04338c), 2024-01-01

## Supplementary Information

### S1. <sup>1</sup>H-NMR spectra of Azobis

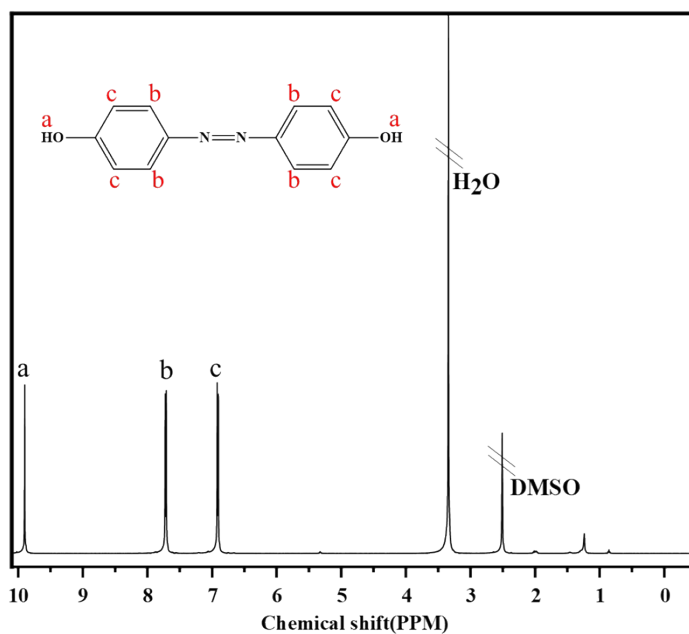

### S2. <sup>1</sup>H-NMR spectra of IPDI

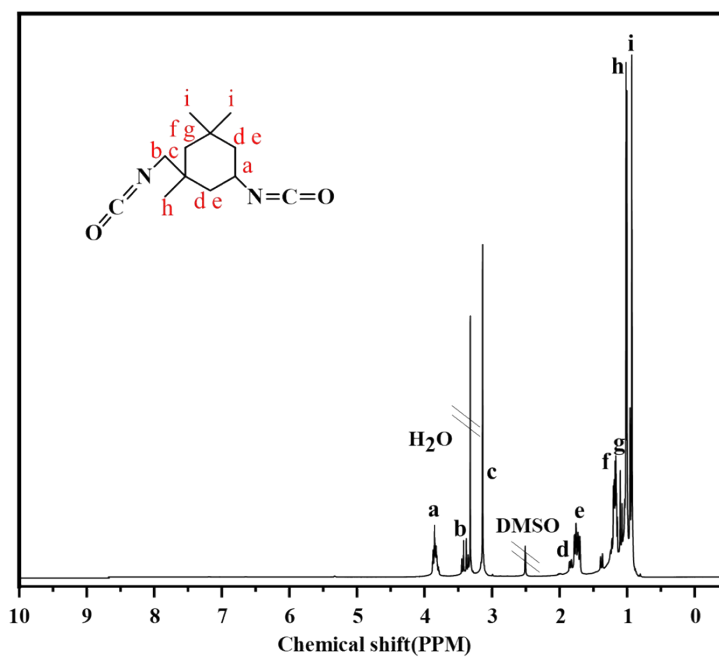

S3.  $^1\text{H-NMR}$  spectra of mixture of Azobis and IPDI

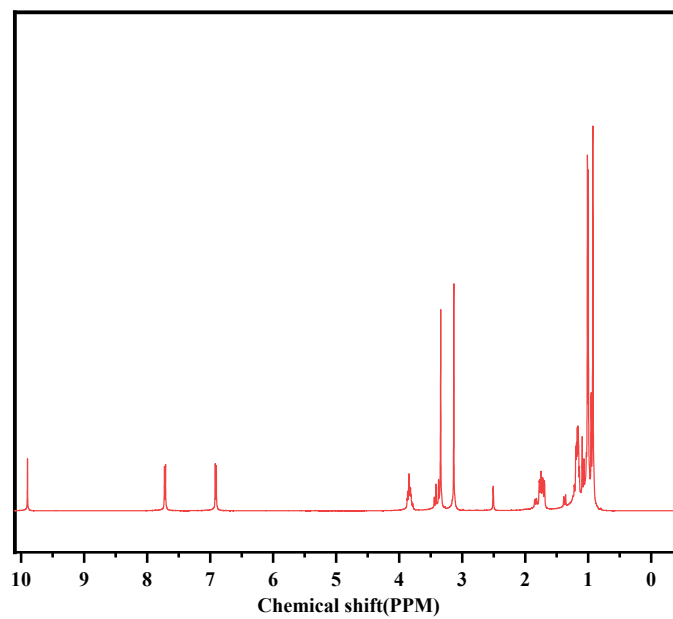

S4. GPC image of Bisdi

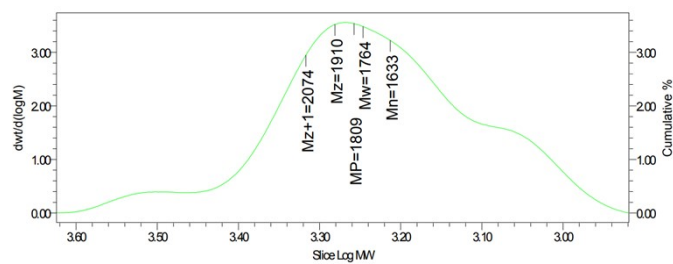

S5. XRD patterns of PEC and PEC-Bisdi<sub>10</sub>

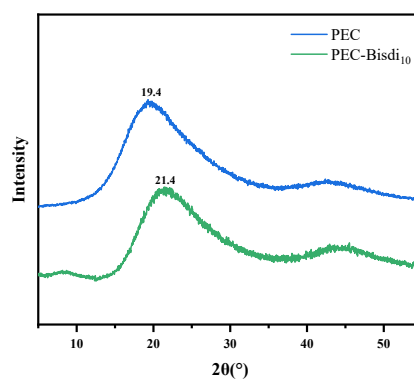

S6. Localized magnified XPS spectra (a: C 1s. b: N 1s. c: O 1s)

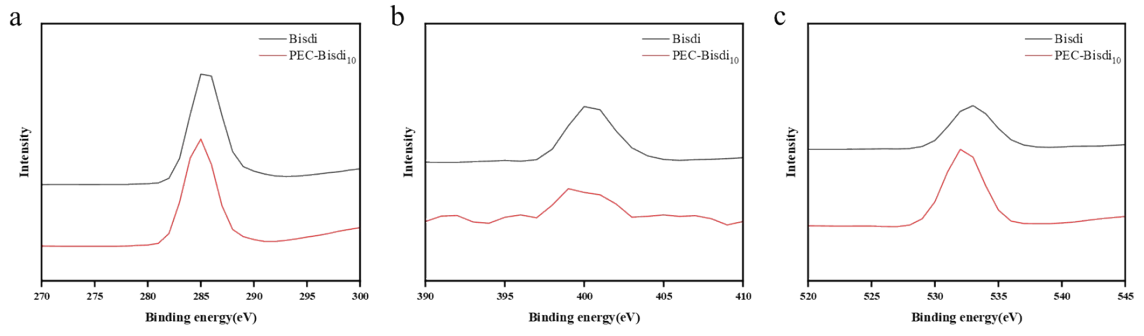

S7. Schematic diagram of different infill patterns printing paths

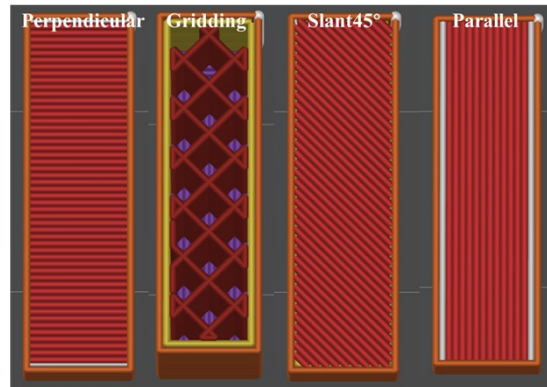

Supplement: d4ta04338c1.pdf [file d4ta04338c1.pdf]
